# Supplementary material for: Effect of Randomisation to 6-Month Mediterranean versus Low-Fat Diet Intervention on Inflammation and Adiposity in Patients with Coronary Heart Disease; Preliminary Results of the AUSMED Heart Trial
Source: Preprints.org preprint supplement (doi:10.20944/preprints201807.0509.v1), 2018-07-26
Supplement: Supplementary file 1 [file supplementary]

# **Effect of randomisation to 6-month Mediterranean versus low-fat diet intervention on inflammation and adiposity in patients with coronary heart disease; Preliminary results of the AUSMED Heart Trial**

**Hannah L Mayr <sup>1,\*</sup>, Catherine Itsiopoulos <sup>1</sup>, Audrey C Tierney <sup>1,2</sup>, Jessica Radcliffe <sup>1</sup>, Teagan Kucianski <sup>1</sup> and Colleen J Thomas <sup>3</sup>**

<sup>1</sup> Department of Rehabilitation, Nutrition and Sport, School of Allied Health, La Trobe University, Melbourne, Victoria, 3086, Australia

<sup>2</sup> School of Allied Health, University of Limerick, Castletroy, Limerick, V94 T9PX, Ireland

<sup>3</sup> Department of Physiology, Anatomy and Microbiology, School of Life Sciences, La Trobe University, Melbourne, Victoria, 3086, Australia

\*Correspondence: [h.mayr@latrobe.edu.au](mailto:h.mayr@latrobe.edu.au); Tel.: +61-3-94791721

**Table S1.** Frequency of attendance for study appointments and phone reviews and access to other health services during the intervention period in the total cohort and within study groups

|                                           | <b>Total cohort</b> | <b>Low-fat diet</b> | <b>MedDiet</b> | <b>p-value</b> |
|-------------------------------------------|---------------------|---------------------|----------------|----------------|
| <i>Study services (n=65)</i>              |                     |                     |                |                |
| 3-week phone review                       | 53 (81.5)           | 26 (83.9)           | 27 (79.4)      | 0.89           |
| 6-week phone review                       | 57 (87.7)           | 28 (90.3)           | 19 (85.3)      | 0.81           |
| 9-week phone review                       | 57 (87.7)           | 28 (90.3)           | 29 (85.3)      | 0.88           |
| 3-month appointment                       | 60 (92.3)           | 30 (96.8)           | 30 (88.2)      | 0.41           |
| 4-month phone review                      | 56 (86.2)           | 26 (83.9)           | 30 (88.2)      | 0.62           |
| 5-month phone review                      | 55 (84.6)           | 25 (80.6)           | 30 (88.2)      | 0.62           |
| 6-month appointment                       | 56 (86.2)           | 29 (93.5)           | 27 (79.4)      | 0.20           |
| <i>Health services (n=60)<sup>a</sup></i> |                     |                     |                |                |
| Cardiologist                              | 32 (53.3)           | 17 (56.7)           | 15 (50.0)      | 0.80           |
| Other specialist                          | 37 (45.0)           | 16 (53.3)           | 11 (36.7)      | 0.30           |
| General Practitioner                      | 58 (96.7)           | 30 (100)            | 28 (93.3)      | 0.47           |
| Allied health                             | 17 (28.3)           | 9 (30)              | 8 (26.7)       | 1.00           |
| Dietitian                                 | 1 (1.7)             | 1 (3.3)             | 0 (0.0)        | 1.00           |
| Cardiac rehabilitation <sup>b</sup>       | 6 (10.0)            | 4 (13.3)            | 2 (6.7)        | 0.67           |
| Hospital admission <sup>c</sup>           | 11 (18.3)           | 8 (26.7)            | 3 (10.0)       | 0.18           |
| Cardiac event <sup>d</sup>                | 1 (1.7)             | 1 (3.3)             | 0 (0.0)        | 1.00           |
| Medical test                              | 33 (55.0)           | 16 (53.3)           | 17 (56.7)      | 1.00           |
| Cardiac test                              | 15 (25.0)           | 10 (33.3)           | 5 (16.7)       | 0.23           |
| Cardiac procedure <sup>d</sup>            | 1 (1.7)             | 1 (3.3)             |                | 1.00           |

Data are N (%). <sup>a</sup>Use of health services includes any time across the intervention period, only participants who attended at least the 3-month appointment have been included. <sup>b</sup>Participants had indicated they completed rehabilitation prior to the study intervention. <sup>c</sup>Hospital admission may include day procedure or emergency presentation with medical tests performed; for the low-fat diet group these were for colonoscopy, iron deficiency anaemia, Bell's Palsy, hip replacement, undiagnosed sore on head, hernia repair, traveller's diarrhoea and chest pain, and for the MedDiet group these were for colonoscopy (2 participants) and renal calculi. <sup>d</sup>Participant who dropped out after 3-months experienced acute myocardial infarction and had an angiogram performed.

**Table S2.** Proportion of participants taking prescribed medications and supplements across intervention time points in the study groups

|                                           | Low-fat diet |           |                        |                 | MedDiet                |           |           |                 |
|-------------------------------------------|--------------|-----------|------------------------|-----------------|------------------------|-----------|-----------|-----------------|
|                                           | Baseline     | 3-month   | 6-month                | <i>p</i> -value | Baseline               | 3-month   | 6-month   | <i>p</i> -value |
| Medication Use                            | 31 (100)     | 31 (100)  | 30 (96.7) <sup>a</sup> | 0.37            | 34 (100)               | 34 (100)  | 34 (100)  | 1.00            |
| Anti-platelet                             | 29 (93.5)    | 29 (93.5) | 28 (90.3) <sup>a</sup> | 0.37            | 30 (88.2)              | 30 (88.2) | 30 (88.2) | 1.00            |
| Statin                                    | 26 (83.9)    | 26 (83.9) | 26 (83.9)              | 1.00            | 31 (91.2)              | 31 (91.2) | 31 (91.2) | 1.00            |
| Other lipid-lowering                      | 3 (9.7)      | 3 (9.7)   | 3 (9.7)                | 1.00            | 3 (8.8)                | 3 (8.8)   | 3 (8.8)   | 1.000           |
| β-blocker                                 | 21 (67.7)    | 21 (67.7) | 21 (67.7)              | 1.00            | 24 (70.6)              | 19 (55.9) | 19 (55.9) | 0.007*          |
| ACE inhibitor                             | 15 (48.4)    | 16 (51.6) | 17 (54.8)              | 0.22            | 17 (50.0)              | 18 (52.9) | 18 (52.9) | 0.37            |
| Angiotensin 2 receptor blocker            | 6 (19.4)     | 6 (19.4)  | 6 (19.4)               | 1.00            | 8 (23.5)               | 8 (23.5)  | 8 (23.5)  | 1.00            |
| Ca <sup>2+</sup> channel blocker          | 5 (16.1)     | 5 (16.1)  | 5 (16.1)               | 1.00            | 4 (11.8)               | 3 (8.8)   | 3 (8.8)   | 0.37            |
| Oral hypoglycaemic agent                  | 7 (22.6)     | 7 (22.6)  | 7 (22.6)               | 1.00            | 8 (23.5)               | 8 (23.5)  | 8 (23.5)  | 1.00            |
| Insulin                                   | 2 (6.5)      | 2 (6.5)   | 2 (6.5)                | 1.00            | 3 (8.8)                | 3 (8.8)   | 3 (8.8)   | 1.00            |
| Anti-reflux                               | 9 (29.0)     | 9 (29.0)  | 9 (29.0)               | 1.00            | 9 (26.5)               | 9 (26.5)  | 9 (26.5)  | 1.00            |
| Diuretic                                  | 5 (16.1)     | 5 (16.1)  | 4 (12.9)               | 0.37            | 3 (8.8)                | 3 (8.8)   | 5 (14.7)  | 0.14            |
| Thyroid medication                        | 1 (3.2)      | 1 (3.2)   | 1 (3.2)                | 1.00            | 5 (14.7)               | 5 (14.7)  | 5 (14.7)  | 1.00            |
| Anti-depressant                           | 3 (9.7)      | 4 (12.9)  | 4 (12.9)               | 0.37            | 4 (11.8)               | 4 (11.8)  | 4 (11.8)  | 0.37            |
| Pain relief                               | 3 (9.7)      | 3 (9.7)   | 3 (9.7)                | 1.00            | 5 (14.7)               | 5 (14.7)  | 4 (12.1)  | 1.00            |
| NSAID                                     | 2 (6.5)      | 2 (6.5)   | 1 (3.2)                | 0.37            | 0 (0.0)                | 0 (0.0)   | 0 (0.0)   | 1.00            |
| <i>Self-report compliance<sup>b</sup></i> |              |           |                        |                 |                        |           |           |                 |
| 100%                                      | 23 (74.2)    | 24 (77.4) | 24 (77.4)              |                 | 28 (84.8) <sup>b</sup> | 27 (79.4) | 27 (79.4) |                 |
| 90%                                       | 6 (19.4)     | 7 (22.6)  | 6 (19.4)               |                 | 4 (12.1)               | 5 (14.7)  | 5 (14.7)  |                 |
| 75%                                       | 1 (3.2)      |           |                        |                 | 1 (3.0)                | 1 (3.0)   | 1 (3.0)   |                 |
| <50% <sup>c</sup>                         | 1 (3.2)      |           |                        |                 |                        |           |           |                 |
| Nil                                       |              |           | 1 (3.2) <sup>a</sup>   |                 |                        |           |           |                 |
| Supplement use                            | 13 (41.9)    | 13 (41.9) | 13 (41.9)              | 1.00            | 15 (44.1)              | 14 (41.2) | 17 (50.0) | 0.31            |
| Omega-3                                   | 3 (9.7)      | 4 (12.9)  | 4 (12.9)               | 0.37            | 7 (20.6)               | 7 (20.6)  | 6 (17.6)  | 0.72            |
| Vitamin D                                 | 5 (16.1)     | 6 (19.4)  | 7 (22.6)               | 0.22            | 7 (20.6)               | 7 (20.6)  | 8 (23.5)  | 0.37            |
| Multivitamin                              | 5 (16.1)     | 5 (16.1)  | 4 (12.9)               | 0.72            | 3 (8.8)                | 2 (5.9)   | 2 (5.9)   | 0.37            |
| CoQ10                                     | 5 (16.1)     | 5 (16.1)  | 6 (19.4)               | 0.37            | 2 (5.9)                | 2 (5.9)   | 2 (5.9)   | 1.00            |
| Glucosamine                               | 0 (0.0)      | 1 (3.2)   | 1 (3.2)                | 0.61            | 4 (11.8)               | 4 (11.8)  | 3 (8.8)   | 0.37            |
| Magnesium                                 | 3 (9.7)      | 1 (3.2)   | 2 (6.5)                | 0.22            | 3 (8.8)                | 3 (8.8)   | 4 (11.8)  | 0.72            |
| Iron                                      | 2 (6.5)      | 2 (6.5)   | 3 (9.7)                | 0.37            | 0 (0.0)                | 0 (0.0)   | 2 (5.9)   | 0.14            |
| Vitamin E                                 | 1 (3.2)      | 1 (3.2)   | 1 (3.2)                | 1.00            | 0 (0.0)                | 0 (0.0)   | 0 (0.0)   | -               |
| Vitamin C                                 | 1 (3.2)      | 1 (3.2)   | 1 (3.2)                | 1.00            | 0 (0.0)                | 1 (2.9)   | 1 (2.9)   | 0.37            |

Data are N (%). MedDiet, Mediterranean diet; β, beta; ACE, angiotensin converting enzyme; NSAID, non-steroidal anti-inflammatory drug; CoQ10, coenzyme Q10. <sup>a</sup>One participant stopped taking anti-platelet medication. <sup>b</sup>One participant who dropped out did not complete this question and has not been included at any time point. <sup>c</sup>One participant with prescription NSAID reported <50% for compliance as it was prescribed *Pro Re Nata* (as needed) for osteoarthritis; their use of the medication was ceased after 3-months.\*Significant within-group change across time points, *p*<0.05.

**Table S3.** Adjusted means of cardiometabolic risk markers at 6-months by tertiles of 6-month change in MEDAS score<sup>a</sup>

| Risk variable                 | T1 (-2 to +1)<br><i>n</i> =22 |              | T2 (+2 to 5)<br><i>n</i> =27 |              | T3 (+6 to 9)<br><i>n</i> =15 |               |
|-------------------------------|-------------------------------|--------------|------------------------------|--------------|------------------------------|---------------|
|                               | Adjusted mean                 | 95% CI       | Adjusted mean                | 95% CI       | Adjusted mean                | 95% CI        |
| <i>Anthropometry</i>          |                               |              |                              |              |                              |               |
| Weight (kg) <sup>†</sup>      | 85.9                          | 84.7, 87.3   | 85.3                         | 84.1, 86.5   | 84.1                         | 82.6, 85.7    |
| BMI (kg/m <sup>2</sup> )      | 30.1                          | 29.6, 30.5   | 30.0                         | 29.5, 30.4   | 29.6                         | 29.1, 30.2    |
| Waist circumference (cm)      | 103.5                         | 102.1, 104.9 | 102.6                        | 101.3, 103.9 | 100.7                        | 99.0, 102.3*  |
| Waist-hip ratio               | 0.981                         | 0.967, 0.995 | 0.965                        | 0.952, 0.978 | 0.959                        | 0.942, 0.976* |
| <i>Body composition</i>       |                               |              |                              |              |                              |               |
| FMI (kg/m <sup>2</sup> )      | 10.2                          | 9.82, 10.57  | 10.2                         | 9.85, 10.53  | 9.8                          | 9.31, 10.21   |
| Total body fat (%)            | 33.9                          | 33.1, 34.7   | 33.7                         | 32.9, 34.4   | 32.9                         | 32.0, 33.9    |
| Trunk fat (%)                 | 36.6                          | 35.6, 37.6   | 36.0                         | 35.1, 37.0   | 35.3                         | 34.1, 36.4    |
| VAT (cm <sup>2</sup> )        | 196.0                         | 186.0, 206.0 | 200.0                        | 190.9, 209.0 | 195.3                        | 183.5, 207.1  |
| SAT (cm <sup>2</sup> )        | 331.7                         | 315.0, 348.4 | 313.4                        | 298.3, 328.6 | 304.3                        | 284.3, 324.3* |
| <i>Haemodynamic</i>           |                               |              |                              |              |                              |               |
| SBP (mmHg)                    | 136.5                         | 132.1, 140.8 | 136.1                        | 132.1, 140.8 | 133.4                        | 128.2, 138.5  |
| DBP (mmHg)                    | 82.0                          | 79.5, 84.4   | 82.1                         | 79.9, 84.4   | 80.8                         | 77.9, 83.7    |
| HR (bpm)                      | 66.0                          | 62.9, 69.1   | 66.2                         | 63.4, 69.1   | 65.9                         | 62.2, 69.6    |
| <i>Pathology<sup>†</sup></i>  |                               |              |                              |              |                              |               |
| LDL (mmol/L)                  | 1.69                          | 1.51, 1.90   | 1.97                         | 1.77, 2.17   | 1.70                         | 1.49, 1.95    |
| HDL (mmol/L)                  | 1.26                          | 1.19, 1.33   | 1.19                         | 1.14, 1.25   | 1.19                         | 1.11, 1.27    |
| Triglycerides (mmol/L)        | 1.16                          | 1.01, 1.33   | 1.37                         | 1.22, 1.55   | 1.30                         | 1.11, 1.53    |
| Glucose (mmol/L) <sup>‡</sup> | 5.09                          | 4.79, 5.41   | 5.32                         | 5.06, 5.61   | 5.50                         | 5.12, 5.87    |
| hs-CRP (mg/L)**               | 0.69                          | 0.43, 1.09   | 0.83                         | 0.54, 1.27   | 0.87                         | 0.50, 1.50    |
| hs-IL-6 (pg/mL)               | 1.42                          | 1.09, 1.99   | 1.46                         | 1.09, 1.96   | 1.46                         | 0.99, 2.15    |
| Adiponectin (ng/mL)           | 7.19                          | 6.08, 8.51   | 7.62                         | 6.44, 9.59   | 7.87                         | 6.44, 9.59    |

MEDAS, Mediterranean Diet Adherence Screener; T, tertile; CI, confidence interval; BMI, body mass index; FMI, fat mass index; VAT visceral adipose tissue; SAT, subcutaneous adipose tissue; SBP, systolic blood pressure; DBP, diastolic blood pressure; HR, heart rate; LDL, low-density lipoprotein; HDL, high-density lipoprotein; hs-CRP, high sensitivity C-reactive protein; hs-IL-6, high sensitivity interleukin-6. <sup>a</sup>Adjusted average indices as least-square means with 95%CI from multi-variable linear models adjusted for baseline value, sex, age, type 2 diabetes mellitus, time since coronary event and change in moderate-to-vigorous activity levels. \*Significant difference between T1 and T3, *p*<0.05. <sup>†</sup>Variable log-transformed and data are presented as adjusted geometric means and confidence intervals have been backwards logged. <sup>‡</sup>One participant with T2DM had a major increase in insulin dosage and was excluded from analyses. <sup>‡</sup>Two participants excluded for value >10mg/L.
